# Supplementary material for: Pre-lithiated Li4+xTi5O12 (0 ≤ x ≤ 3) anodes towards building high-performance Li-ion capacitors
Source: Royal Society of Chemistry journal article supplement (doi:10.1039/d2se01081j), 2022-01-01
Supplement: d2se01081j1.pdf [file d2se01081j1.pdf]

## Supplementary data

- **Determination of bulk Li<sup>+</sup> ion diffusion coefficient by Cyclic voltammetry**

From Randles Sevcik Equation

$$D = \left[ \frac{\text{slope}}{26800 \times n^{3/2} \times A \times C} \right]^2$$

Diffusion coefficient,

$$\text{Anodic slope} = 0.00249 \frac{A}{(Vs^{-1})^{1/2}} \text{ [figure S4(b)]}$$

$$\text{Cathodic slope} = 0.00264 \frac{A}{(Vs^{-1})^{1/2}} \text{ [figure S4(b)]}$$

$n \rightarrow$  number of electrons transferred in the redox event = 3

$A \rightarrow$  electrode area in  $cm^2 = 1.5 \text{ cm}^2$

$C \rightarrow$  Concentration of electrolyte,  $1M \text{ LiPF}_6 = 10^{-3} \text{ mol cm}^{-3}$

$$D_{Li^+} \text{ lithiation} = 1.5 \times 10^{-10} \text{ cm}^2 \text{ s}^{-1}$$

$$D_{Li^+} \text{ delithiation} = 1.42 \times 10^{-10} \text{ cm}^2 \text{ s}^{-1}$$

- **Determination of bulk Li<sup>+</sup> ion diffusion coefficient from Warburg tail of EIS Nyquist**

**plot**

$$D_{Li^+} = \frac{R^2 T^2}{2A^2 n^4 F^4 C^2 \sigma^2}$$

$R \rightarrow$  gas constant =  $8.314 \text{ J mol}^{-1} \text{ K}^{-1}$

$T \rightarrow$  absolute temperature =  $298.16 \text{ K}$

$A \rightarrow$  electrode area in  $cm^2 = 1.5 \text{ cm}^2$

$C \rightarrow$  Concentration of electrolyte,  $1M \text{ LiPF}_6 = 10^{-3} \text{ mol cm}^{-3}$

$n \rightarrow$  number of electrons transferred in the redox event = 3

$F \rightarrow$  Faraday constant =  $96,485 \text{ C mol}^{-1}$

$\sigma \rightarrow$  Warburg coefficient  
 = slope of the graph between the real impedance and the inverse square root of  $\omega$   
 =  $76.947 \Omega s^{-1}$

[figure S4(d)]

$$D_{Li^+} = 3.28 \times 10^{-14} \text{ cm}^2 \text{ s}^{-1}$$

- **Solid-state diffusion coefficient of Li within the particle at different levels of prelithiation**

$$D_{Li^+} = \frac{R^2 T^2}{2 A^2 n^4 F^4 C_{Li^+}^2 \sigma^2}$$

$C_{Li^+} \rightarrow$  Concentration of  $Li^+$  in the solid phase of electrode

$$C_{Li^+} = \frac{4 + 3x}{459.08 \text{ gmol}^{-1}} \times 3.38 \text{ gcm}^{-3}$$

$459.08 \text{ gmol}^{-1} \rightarrow$  Molecular weight of LTO

$3.38 \text{ gcm}^{-3} \rightarrow$  Density of LTO

$x \rightarrow$  stoichiometric amount of Li inserted in LTO corresponding to % DOD

| Prelithiation level                                                 | Value of x | $C_{Li^+}$ (mols $\text{cm}^{-3}$ ) | $D_{Li^+}$ ( $\text{cm}^2 \text{ s}^{-1}$ )<br>[figure S5(b)] |
|---------------------------------------------------------------------|------------|-------------------------------------|---------------------------------------------------------------|
| No prelithiation ( $\text{Li}_4\text{Ti}_5\text{O}_{12}$ )          | 0          | 0.0294                              | $1.74 \times 10^{-17}$                                        |
| 30 min<br>( $\text{Li}_5\text{Ti}_5\text{O}_{12}$ )                 | 0.33       | 0.0368                              | $7.7 \times 10^{-18}$                                         |
| 60 min<br>( $\text{Li}_6\text{Ti}_5\text{O}_{12}$ )                 | 0.66       | 0.044                               | $7.04 \times 10^{-18}$                                        |
| Complete Prelithiation<br>( $\text{Li}_7\text{Ti}_5\text{O}_{12}$ ) | 1          | 0.515                               | $1.7 \times 10^{-17}$                                         |

## Formulas used for the assembly of AC/LTO LICs

- **Preparation of the AC electrode:**

- According to the Mass loading formula

$$Q = q_{positive} * m_{positive} = q_{negative} * m_{negative}$$

Where Q=Discharge (mAh)

q=Specific capacity in second discharge cycle (mAh g<sup>-1</sup>)

m=mass of active material in the electrode

- **Energy and Power Density calculation:**

- Charge Q, (mAh) = Current (mA) \* time (h)
- Capacity C, (mAh g<sup>-1</sup>) = Q/m
  - m= total mass of active material in both the electrodes
- The energy density (Wh kg<sup>-1</sup>) = C\*V
  - V= Intersecting voltage of the second charge-discharge curve.
- Power Density= Energy density/time (h)

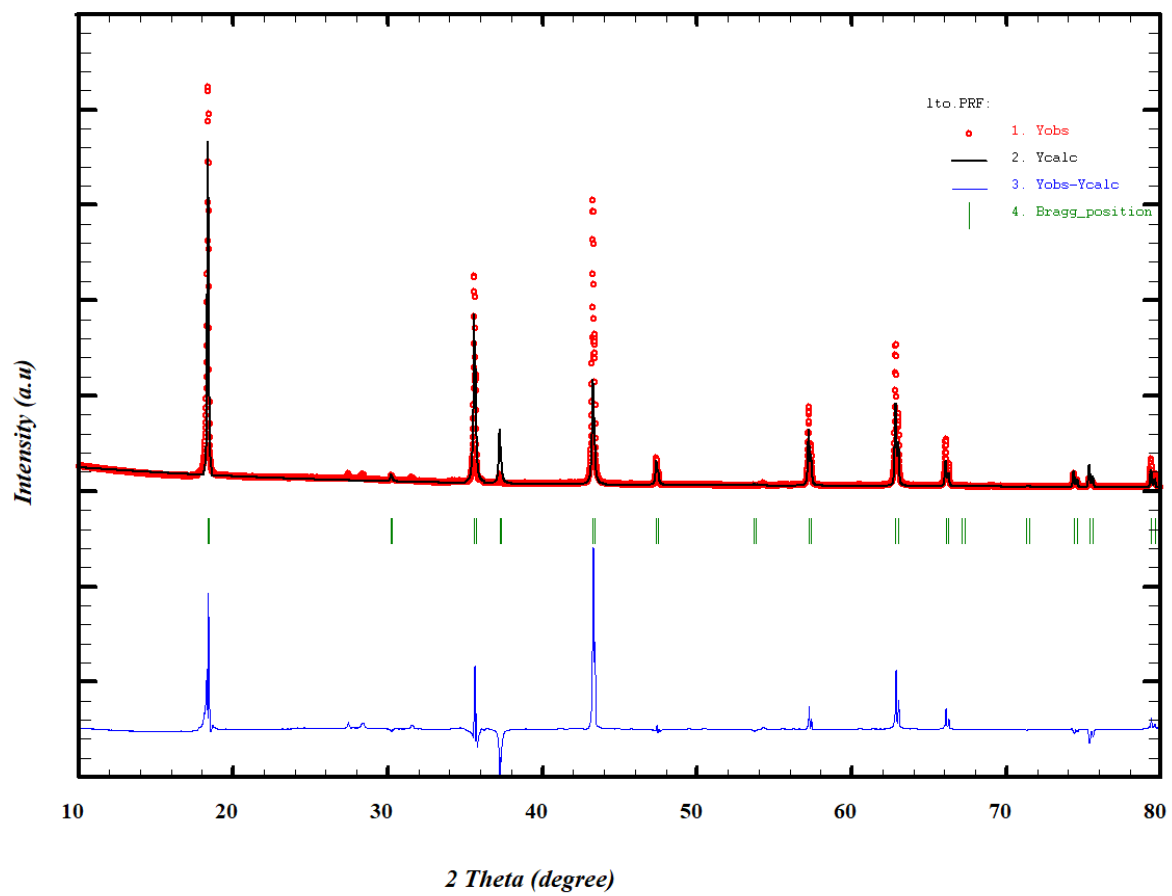

**Figure S1:** The XRD pattern of commercial LTO material along with Rietveld refinement.

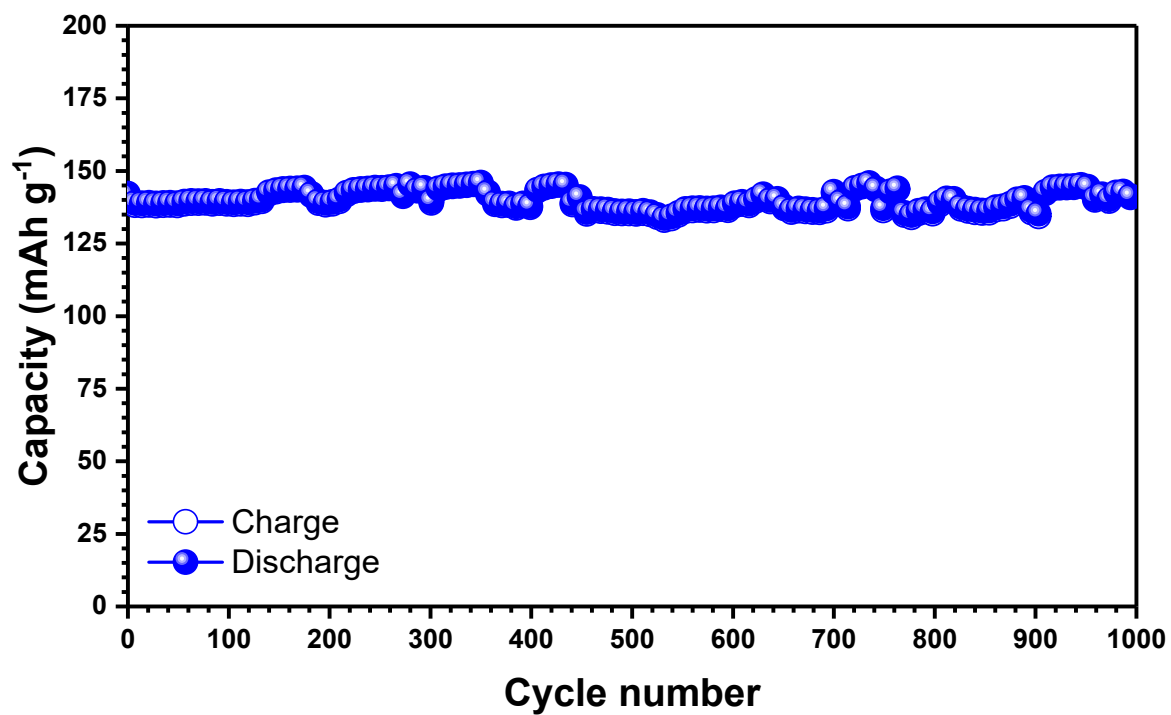

**Figure S2:** Cyclic stability of Li/LTO half-cells at a current density of 1 A g<sup>-1</sup>.

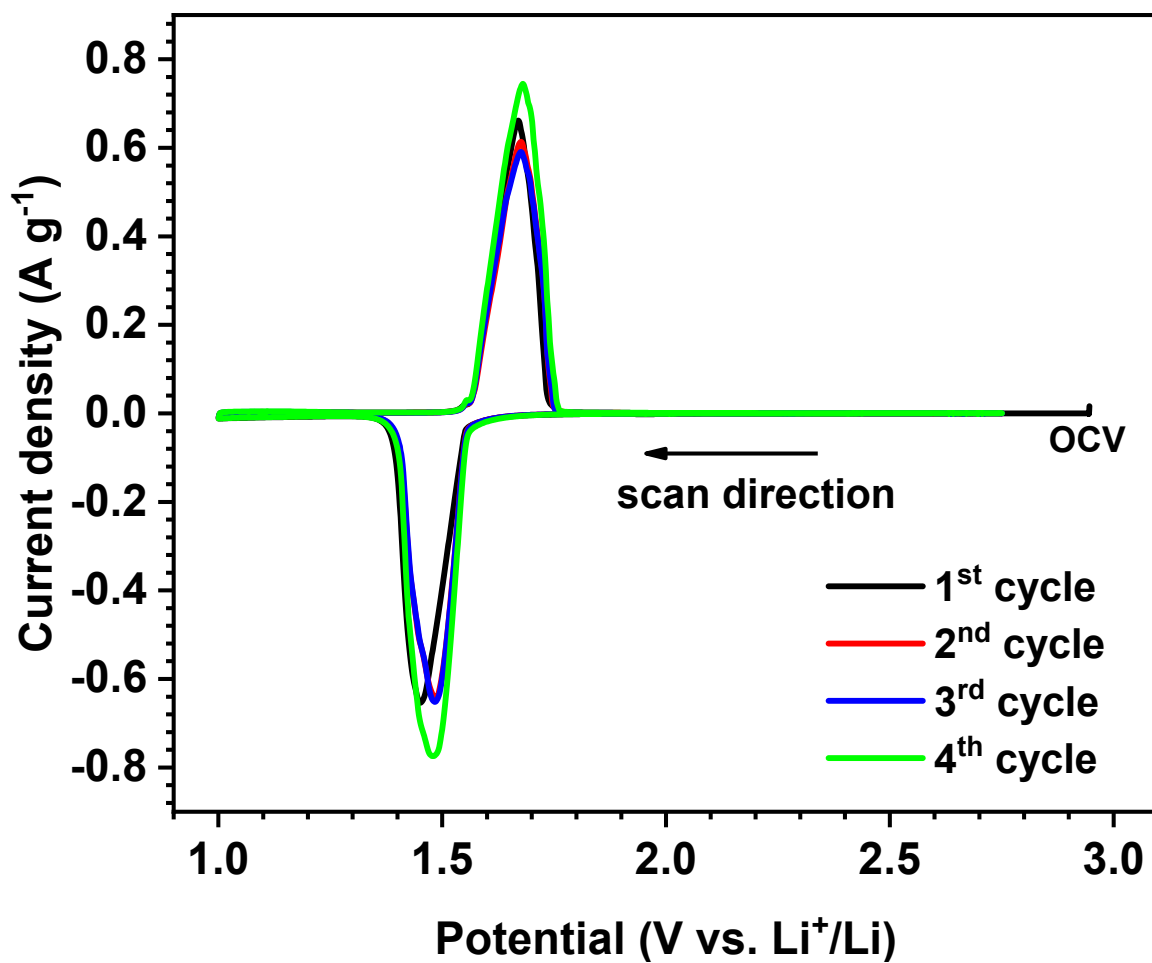

**Figure S3:** CV profile of Li/LTO half-cell within the potential window of 1-2.75 V vs. Li<sup>+</sup>/Li at 0.1 mV s<sup>-1</sup> (first four cycles).

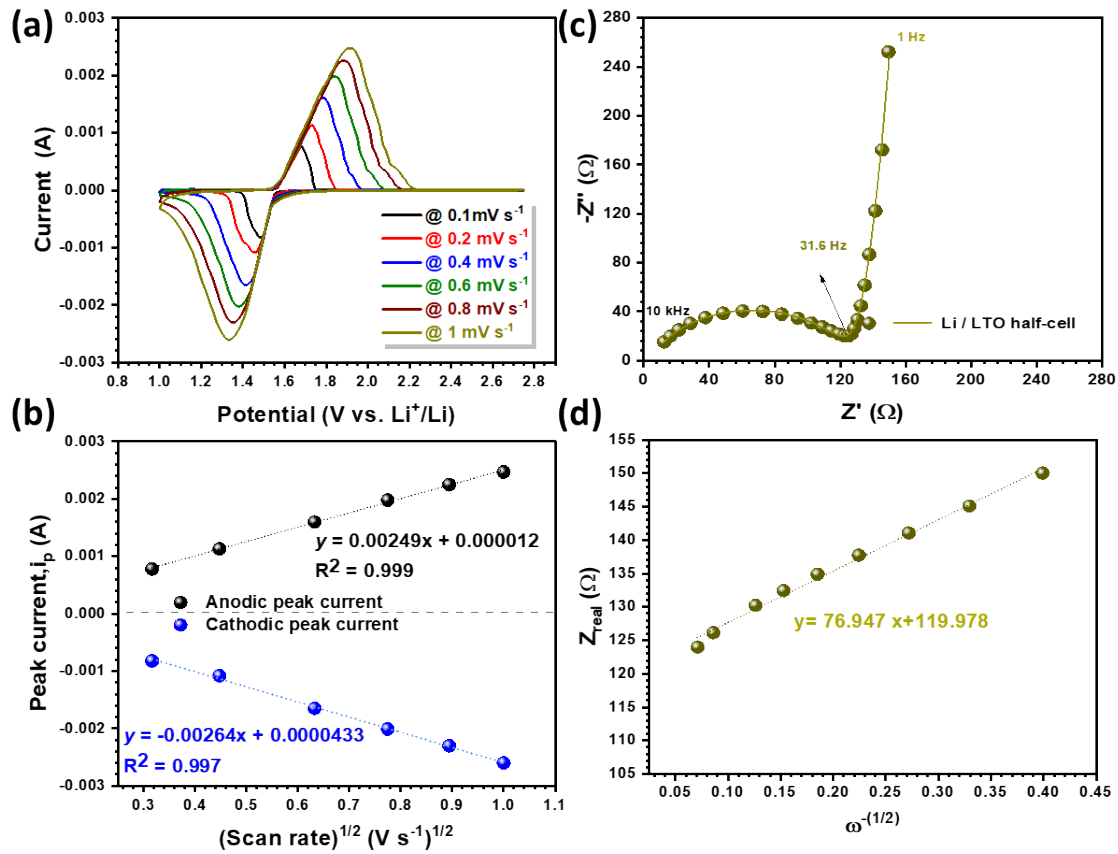

**Figure S4:** (a) CV profile of Li/LTO half-cell at different scan rates (0.1-1  $\text{mV s}^{-1}$ ), (b) plot of anodic and cathodic peak current ( $i_p$ ) versus square root of scan rate ( $\sqrt{v}$ ), (c) EIS Nyquist plot of Li/LTO half-cell within the frequency range of 10 kHz to 1 Hz, and (d) Real impedance versus inverse square root of angular frequency in the Warburg tail region.

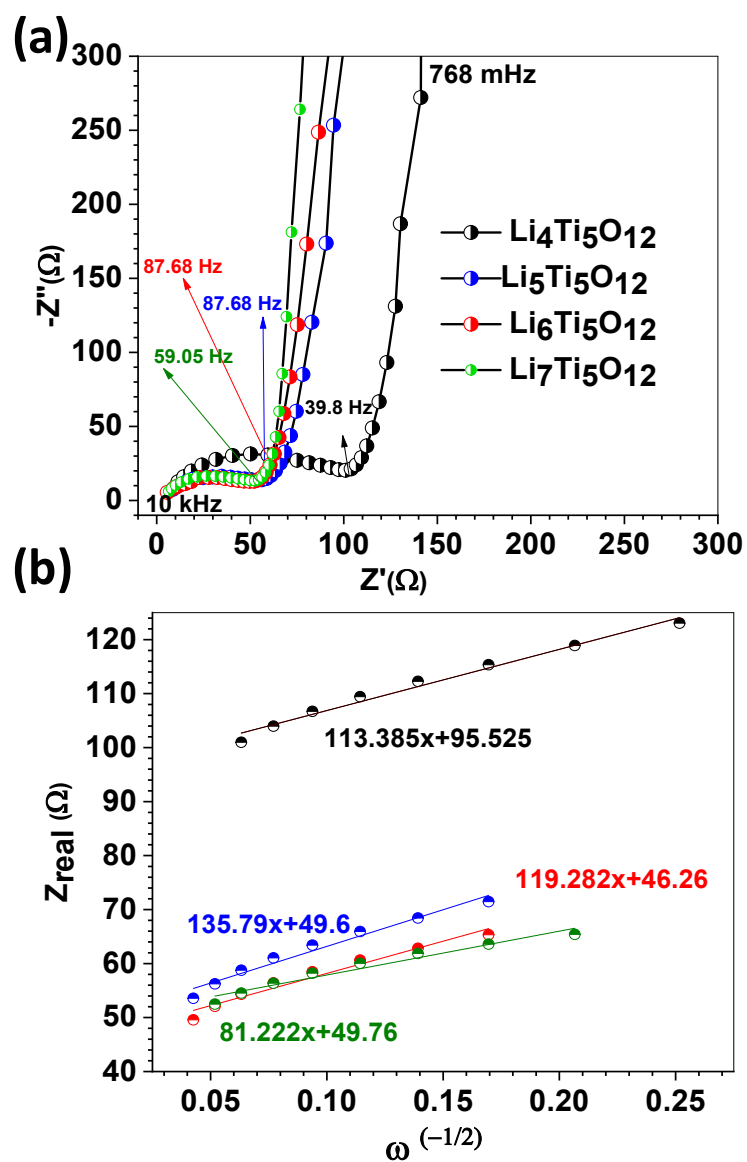

**Figure S5:** (a) EIS Nyquist plot of Li/LTO half-cell with different levels of prelithiation (0, 30, 60 & 90 min) within the frequency range of 10 kHz to 10mHz, and (b) Real impedance versus inverse square root of angular frequency in the Warburg tail region.



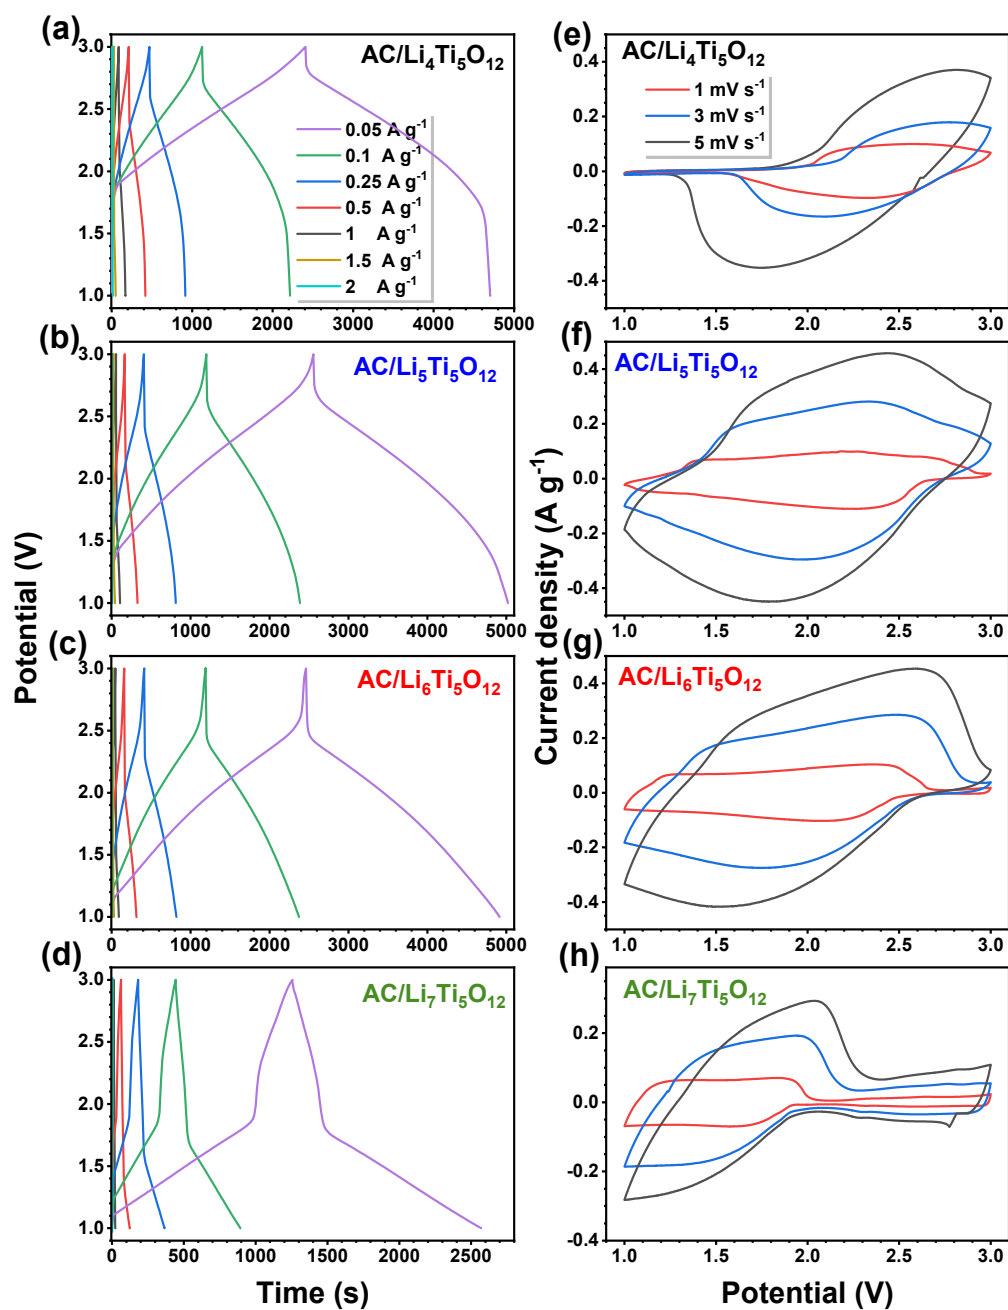

**Figure S6:** (a, b, c & d) Potential vs. time graph of the assembled LICs at different current rates (0.05-2 A g<sup>-1</sup>), and (e, f, g, h) the CV profile of assembled LICs at different scan rates (1, 3 & 5 mV s<sup>-1</sup>).

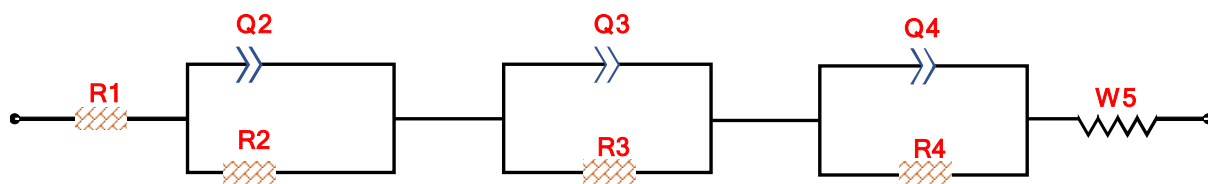

**Figure S7:** Equivalent circuit model used to fit EIS Nyquist plots recorded for the assembled LIC configurations within the frequency limit of 10 kHz to 10 mHz
